# Supplementary material for: STAC: A method for testing the significance of DNA copy number aberrations across multiple array-CGH experiments
Source: HighWire-hosted journal article supplement (doi:10.1101/gr.5076506), 2006-08-09
Supplement: Diskin_Suppl_Figure_1.pdf [file Diskin_Suppl_Figure_1.pdf]

**Supplementary Figure 1. Genome-wide STAC results for chromosomes 1-22.**

Locations with  $p$ -value  $< 0.05$  for either statistic are plotted. *Green*: gain, *Red*: loss. **(a)** neuroblastoma. **(b)** breast cancer. Locations for which the "best" stack (*i.e.* stack with minimum  $p$ -value anchored at the location) comprises three or less intervals are not reported.

**Supplementary Figure 1.**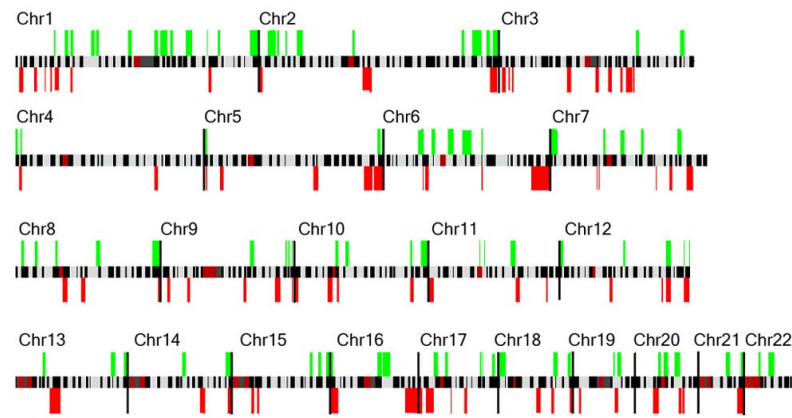**(a) Neuroblastoma**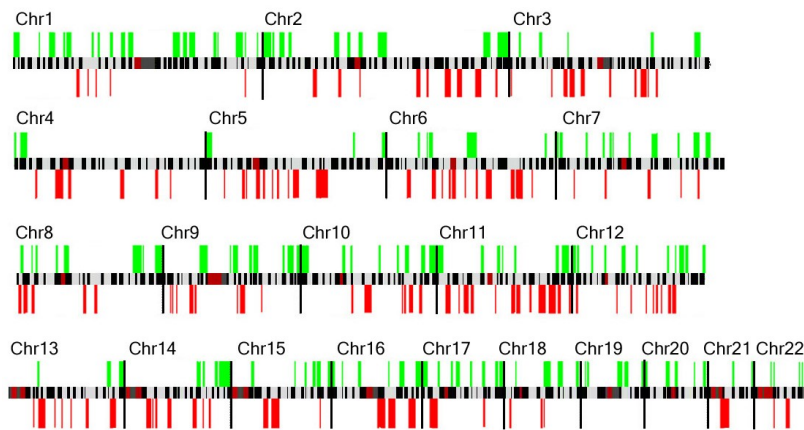**(b) Breast Cancer**
